# Supplementary material for: Validity and reliability of an adapted questionnaire measuring knowledge, awareness and practice regarding familial hypercholesterolaemia among primary care physicians in Malaysia
Source: Springer Nature journal article supplement (doi:10.1186/s12872-020-01845-y), 2021-01-19
Supplement: MOESM1 [file 18780118]

## Supplementary File 1: Adaptation of the FH KAP Questionnaire

### Adaptation of the FH KAP Questionnaire for Knowledge Domain

| Item No. | Area                | Original Question and Answer                                                                                                                                                                                                                                                                                                                                                                                                                                                                                                                                                                                  | Modification/ Addition                                                                                                |
|----------|---------------------|---------------------------------------------------------------------------------------------------------------------------------------------------------------------------------------------------------------------------------------------------------------------------------------------------------------------------------------------------------------------------------------------------------------------------------------------------------------------------------------------------------------------------------------------------------------------------------------------------------------|-----------------------------------------------------------------------------------------------------------------------|
| 3        | Description of FH   | <p>Question:</p> <p>Which one description below best describes FH?</p> <p>Answer:</p> <ul style="list-style-type: none"><li>- The presence of family members with diagnosed high cholesterol</li><li>- A genetic disorder that is characterized by very high cholesterol and a family history of premature heart disease</li><li>- The presence of multiple lipid abnormalities that may be genetic in nature</li><li>- An ultra-rare, potentially fatal condition caused by cholesterol levels that can be up to six times the normal level</li><li>- Don't know</li><li>- Others (please specify)</li></ul> | <p>Question: Rephrased</p> <p>Which one of the following descriptions best describes FH?</p> <p>Answer: No change</p> |
| 4        | Lipid profile of FH | <p>Question:</p> <p>Which one of the following lipid profiles is most consistent with the diagnosis of FH? (Reference intervals: Total cholesterol &lt; 5.5mmol/L; Triglyceride &lt; 1.7mmol/L; HDL-cholesterol &gt;1.0mmol/L; LDL-cholesterol &lt; 3.5mmol/L)</p>                                                                                                                                                                                                                                                                                                                                            | <p>Question: No change</p>                                                                                            |

---

Answer:

- Total cholesterol 6.0mmol/L; Triglyceride 3.4mmol/L; HDL-cholesterol 0.8mmol/L; LDL-cholesterol 3.8mmol/L
- Total cholesterol 6.3mmol/L; Triglyceride 12.2mmol/L; HDL-cholesterol 1.0mmol/L; LDL- - mmol/L
- Total cholesterol 8.0mmol/L; Triglyceride 1.1mmol/L; HDL-cholesterol 1.0mmol/L; LDL-cholesterol 6.5mmol/L
- Total cholesterol 5.4mmol/L; Triglyceride 1.3mmol/L; HDL-cholesterol 1.7mmol/L; LDL-cholesterol 3.1mmol/L
- Total cholesterol 7.1mmol/L; Triglyceride 1.0mmol/L; HDL-cholesterol 3.5mmol/L; LDL-cholesterol 3.2mmol/L

Answer: Rephrased

- Total cholesterol 6.3mmol/L; Triglyceride 12.2mmol/L; HDL-cholesterol 1.0mmol/L; LDL-cholesterol not reported

---

6 Prevalence of FH

Question:

What is the prevalence of FH in Australia?

Answer:

- 1 in 100 persons
- 1 in 500 persons
- 1 in 1000 persons
- 1 in 2000 persons
- 1 in 5000 persons
- Don`t know

Question: Modified

What is the prevalence of FH globally?

Answer: No change

---

|   |                   |                                                                                                                                                                                                           |                                                                                                                                                                                                                       |
|---|-------------------|-----------------------------------------------------------------------------------------------------------------------------------------------------------------------------------------------------------|-----------------------------------------------------------------------------------------------------------------------------------------------------------------------------------------------------------------------|
| 7 | Inheritance of FH | <p>Question:</p> <p>What is the likelihood that first-degree relatives (i.e. parents, siblings and children) of someone who has FH will also have the condition themselves?</p>                           | Question: No change                                                                                                                                                                                                   |
|   |                   | Answer:                                                                                                                                                                                                   | Answer: No change                                                                                                                                                                                                     |
|   |                   | <ul style="list-style-type: none"> <li>- 0%</li> <li>- 25%</li> <li>- 50%</li> <li>- 75%</li> <li>- 100%</li> <li>- Don` t know</li> </ul>                                                                |                                                                                                                                                                                                                       |
| 8 | CAD risk in FH    | <p>Question</p> <p>How much greater is the risk of premature coronary artery disease (CAD) in untreated FH patients compared to the general population?</p>                                               | Question: No change                                                                                                                                                                                                   |
|   |                   | Answer:                                                                                                                                                                                                   | Answer: No change                                                                                                                                                                                                     |
|   |                   | <ul style="list-style-type: none"> <li>- 2 times greater</li> <li>- 5 times greater</li> <li>- 10 times greater</li> <li>- 20 times greater</li> <li>- 50 times greater</li> <li>- Don` t know</li> </ul> |                                                                                                                                                                                                                       |
| 9 | Premature CAD age | <p>Question:</p> <p>When you are assessing a patient`s family history, at what age for males and females do you consider CAD to be `premature`? Leave blank if you wish to answer `Don` t know`</p>       | <p>Question: Rephrased</p> <p>When you are assessing a patient`s family history, at what cut-off age for males and females do you consider CAD to be `premature`? Leave blank if you wish to answer `Don` t know`</p> |

|    |                         |                                                                                                                                                                                                                                                 |                                                                                                                                                                                                                                                                                                                                                                                                                                               |
|----|-------------------------|-------------------------------------------------------------------------------------------------------------------------------------------------------------------------------------------------------------------------------------------------|-----------------------------------------------------------------------------------------------------------------------------------------------------------------------------------------------------------------------------------------------------------------------------------------------------------------------------------------------------------------------------------------------------------------------------------------------|
| 11 | Genetic test<br>in FH   | <p>Question:</p> <p>Is the following statement true or false? An accurate diagnosis of FH can only be made via genetic test.</p> <p>Answer:</p> <ul style="list-style-type: none"> <li>- True</li> <li>- False</li> <li>- Don`t know</li> </ul> | <p>Question: No change</p> <p>Answer: No change</p>                                                                                                                                                                                                                                                                                                                                                                                           |
| 22 | Target LDL-c<br>in FH   | *Nil                                                                                                                                                                                                                                            | <p>New Question:</p> <p>What is the target LDL-c following maximum tolerated dose of high intensity statin for patients diagnosed with FH?</p> <p>Answer:</p> <ul style="list-style-type: none"> <li>- &lt; 1.8 mmol/L</li> <li>- &lt; 2.6 mmol/L</li> <li>- &lt; 3.4 mmol/L</li> <li>- &gt; 50% reduction from baseline LDL-c concentration</li> <li>- &gt; 30% reduction from baseline LDL-c concentration</li> <li>- Don`t know</li> </ul> |
| 23 | Family<br>history in FH | *Nil                                                                                                                                                                                                                                            | <p>New Question:</p> <p>Which of the following options are important to obtain from family history in patients with FH? (Please select all that apply)</p> <p>Answer:</p> <ul style="list-style-type: none"> <li>- Consanguinity</li> <li>- Family history of premature CAD (age of</li> </ul>                                                                                                                                                |

---

onset)

- Family history of hypercholesterolaemia (TC and/ or LDL-c)
- Family history of tendon xanthomata
- Family history of unexplained childhood death
- Three-generation pedigree chart
- None of the above
- Don` t know

---

24 Exclusion of FH diagnosis \*Nil

New Question:

Which of the following options would exclude the diagnosis of FH? (Please select all that apply)

Answer:

- Normal LDL-c concentration before puberty
- Absence of clinical signs (e.g. tendon xanthomata)
- Absence of mutation on genetic testing
- Absence of ultrasound finding of tendon xanthomata
- None of the above
- Don` t know

---

25 Management options in FH \*Nil

New Question:

Which of the following are the management options for FH patients? (Please select all that apply)

Answer:

- Lifestyle modification is a substitute for lipid lowering medication
  - Ezetimibe co-administered with statin therapy
-

---

is recommended as an option for adult heterozygous FH

- Lipid lowering drug therapy is considered by the age of 10 years

- Lipid modifying therapy should be continued during pregnancy

- Progress of cascade screening in FH patients should be recorded

- None of the above

- Don't know

---

**Total items: 7**

---

**Total items: 11**

---

## Adaptation of the FH KAP Questionnaire for Awareness Domain

| Item No. | Area                          | Original Question and Answer                                                                                                                                                                                                                | Modification/ Addition                                                                                                                                                                                             |
|----------|-------------------------------|---------------------------------------------------------------------------------------------------------------------------------------------------------------------------------------------------------------------------------------------|--------------------------------------------------------------------------------------------------------------------------------------------------------------------------------------------------------------------|
| 1        | Familiarity with FH           | <p>Question:</p> <p>On a scale of 1 to 7; how familiar are you with FH? (1-Never heard about it to 7-very familiar)</p> <p>Answer:</p> <p>7-point Likert scale (score of 5,6,7 is considered familiar)</p>                                  | <p>Question: No change</p> <p>Answer: No change</p>                                                                                                                                                                |
| 2        | Awareness of FH guideline     | <p>Question:</p> <p>Are you aware of the National Heart Foundation/ Cardiac Society of Australian and New Zealand guidelines on the detection and management of Familial Hypercholesterolaemia?</p> <p>Answer:</p> <p>- Yes</p> <p>- No</p> | <p>Question: Modified</p> <p>Are you aware of the National Institute for Health and Care Excellence (NICE) on Identification and Management of Familial Hypercholesterolaemia (2008)?</p> <p>Answer: No change</p> |
| 16       | Awareness of lipid specialist | <p>Question:</p> <p>Are you aware of any specialist-clinical services for lipid disorders to whom you can refer patients?</p> <p>Answer:</p> <p>- Yes</p> <p>- No (Go to question 18)</p>                                                   | <p>Question: No change</p> <p>Answer: No change except for question number</p> <p>- Yes</p> <p>- No (Go to question 17)</p>                                                                                        |

---

\*This item was re-numbered to 15

---

19 Awareness \*Nil  
of other  
international  
FH  
guideline

New Question:

Which of the following FH clinical guidelines that you are aware of? (Please select all that apply)

Answer:

- Integrated Guidance on the Care of Familial Hypercholesterolaemia by the International FH Foundation (2014)
- Homozygous Familial Hypercholesterolaemia: New Insight and Guidance for Clinicians to Improve Detection and Clinical Management. A Position Paper from the Consensus Panel on Familial Hypercholesterolaemia of the European Atherosclerosis Society (EAS) (2014)
- Guidelines for the Management of Familial Hypercholesterolemia (Harada-Shiba, 2012)
- Clinical Guidance by the National Lipid Association (NLA) Expert Panel on Familial Hypercholesterolaemia (2011)
- None
- Others (please specify)

---

20 Awareness \*Nil  
of FH  
diagnostic  
criteria

New Question:

Which of the following FH diagnostic criteria that you are aware of? (Please select all that apply)

Answer:

- Dutch Lipid Clinic Network Criteria
  - Simon Broome Register Criteria
  - US MED-PED Criteria
-



---

- Japanese Criteria

- None

- Others (please specify)

---

**Total items: 3**

---

**Total items: 5**

---

## Adaptation of the FH KAP Questionnaire for Practice Domain

| Item No. | Area                       | Original Question and Answer                                                                                                                                                                                                                                                                                                                                                                                                                                                                     | Modification/Addition                                                                                                                                                                         |
|----------|----------------------------|--------------------------------------------------------------------------------------------------------------------------------------------------------------------------------------------------------------------------------------------------------------------------------------------------------------------------------------------------------------------------------------------------------------------------------------------------------------------------------------------------|-----------------------------------------------------------------------------------------------------------------------------------------------------------------------------------------------|
| 5        | Assistance in FH detection | <p>Question:</p> <p>Which one of the following options could usefully assist you in detection of FH in your practice?</p> <p>Answer:</p> <ul style="list-style-type: none"> <li>- Laboratory report on a lipid profile alerting possible FH</li> <li>- Alert by the clinical software system in your practice</li> <li>- Direct telephone call from the laboratory</li> <li>- All of the above</li> <li>- None of the above</li> <li>- Don` t know</li> <li>- Others (please specify)</li> </ul> | <p>Question: No change</p> <p>Answer: No change</p>                                                                                                                                           |
| 10       | Family screening of FH     | <p>Question:</p> <p>In patients with documented premature CAD, which of the following do you routinely carry out? (Please tick all that apply)</p> <p>Answer:</p> <ul style="list-style-type: none"> <li>- Look for arcus cornealis</li> <li>- Look for tendon xanthomata</li> <li>- Take a detailed family history of CAD</li> <li>- Screen close relatives for hypercholesterolaemia</li> <li>- All of the above</li> </ul>                                                                    | <p>Question: Rephrased</p> <p>In patients with documented premature CAD, which of the following options do you routinely carry out? (Please tick all that apply)</p> <p>Answer: No change</p> |

|    |                                     |                                                                                                                                                                                                                                                                                                                                                                                     |                                                                                             |
|----|-------------------------------------|-------------------------------------------------------------------------------------------------------------------------------------------------------------------------------------------------------------------------------------------------------------------------------------------------------------------------------------------------------------------------------------|---------------------------------------------------------------------------------------------|
|    |                                     | - None of the above                                                                                                                                                                                                                                                                                                                                                                 |                                                                                             |
| 12 | Number of FH patients under care    | <p>Question:</p> <p>How many patients currently under your care, if any, have been formally diagnosed with FH?</p> <p>*Fill in answer</p>                                                                                                                                                                                                                                           | Moved to demography                                                                         |
| 13 | Screening of relatives in FH        | <p>Question:</p> <p>If you have patients with FH under your care, do you routinely screen close relatives for this condition with a lipid profile?</p> <p>Answer:</p> <ul style="list-style-type: none"> <li>- Yes, patient's children only</li> <li>- Yes, patient's children and other close relatives</li> <li>- No</li> <li>- Not applicable</li> </ul>                         | <p>Question: No change</p> <p>Answer: No change</p> <p>*This item was re-numbered to 12</p> |
| 14 | Effective healthcare provider in FH | <p>Question:</p> <p>In your view, which healthcare providers would be most effective at early detection of FH and screening first-degree relatives? (Please tick up to two options)</p> <p>Answer:</p> <ul style="list-style-type: none"> <li>- Lipid specialists</li> <li>- General practitioners</li> <li>- Cardiologists</li> <li>- Nurses with experience in cardiac</li> </ul> | <p>Question: No change</p> <p>Answer: No change</p>                                         |

|    |                                               |                                                                                                                                                                                                                                                                                                                    |                                                                                                                                                                                                          |
|----|-----------------------------------------------|--------------------------------------------------------------------------------------------------------------------------------------------------------------------------------------------------------------------------------------------------------------------------------------------------------------------|----------------------------------------------------------------------------------------------------------------------------------------------------------------------------------------------------------|
|    |                                               | <p>risk prevention</p> <ul style="list-style-type: none"> <li>- Paediatricians</li> <li>- Obstetricians/ Gynaecologists</li> <li>- Endocrinologists</li> <li>- Others (please specify)</li> </ul>                                                                                                                  | *This item was re-numbered to 13                                                                                                                                                                         |
| 15 | Age for FH screening in young person          | <p>Question:</p> <p>At what age would you test young individuals for hypercholesterolaemia in a family with premature CAD?</p> <p>Answer:</p> <ul style="list-style-type: none"> <li>- 0 - 6 years</li> <li>- 7 - 12 years</li> <li>- 13 - 18 years</li> <li>- None of the above</li> <li>- Don` t know</li> </ul> | <p>Question: No change</p> <p>Answer: No change</p> <p>*This items was re-numbered to 14</p>                                                                                                             |
| 17 | Referral to lipid specialist                  | <p>Question:</p> <p>If yes to question 16, have you referred patients with FH to this service?</p> <p>Answer:</p> <ul style="list-style-type: none"> <li>- Yes</li> <li>- No</li> <li>- Don` t know</li> </ul>                                                                                                     | <p>Question: No change except for question number</p> <p>If yes to question 15, have you referred patients with FH to this service?</p> <p>Answer: No change</p> <p>*This item was re-numbered to 16</p> |
| 18 | Pharmacotherapy used in hypercholesterolaemia | <p>Question:</p> <p>Which drugs do you use to treat hypercholesterolaemia? (Please select all that apply)</p> <p>Answer:</p>                                                                                                                                                                                       | <p>Question: Rephrased</p> <p>Which pharmacological agent(s) do you commonly used to treat hypercholesterolaemia? (Please select all that apply)</p>                                                     |

- Exchange resins / bile acid sequestrants
- Ezetimibe
- Statins
- Fibrates
- Nicotinic acid
- None of the above
- Others (please specify)

Answer: No change

\*This item was re-numbered to 17

|    |                                                                    |                                                                                                                                                                                                                                                                                                                                                                                                                                                                                                                |                                                                                                                                                                                  |
|----|--------------------------------------------------------------------|----------------------------------------------------------------------------------------------------------------------------------------------------------------------------------------------------------------------------------------------------------------------------------------------------------------------------------------------------------------------------------------------------------------------------------------------------------------------------------------------------------------|----------------------------------------------------------------------------------------------------------------------------------------------------------------------------------|
| 19 | Combined pharmacotherapy used in severe hypercholesterolaemia (FH) | <p>Question:</p> <p>Which drug combinations do you use to treat severe hypercholesterolaemia? (Please select all that apply)</p> <p>Answer:</p> <ul style="list-style-type: none"> <li>- Statin + exchange resins / bile acid sequestrants</li> <li>- Statin + nicotinic acid</li> <li>- Statin + ezetimibe</li> <li>- Statin + ezetimibe + nicotinic acid</li> <li>- Statin + ezetimibe + exchange resins / bile acid sequestrants</li> <li>- None of the above</li> <li>- Others (please specify)</li> </ul> | <p>Question: Rephrased</p> <p>Which pharmacological combination(s) do you use to treat severe hypercholesterolaemia? (Please select all that apply)</p> <p>Answer: No change</p> |
|----|--------------------------------------------------------------------|----------------------------------------------------------------------------------------------------------------------------------------------------------------------------------------------------------------------------------------------------------------------------------------------------------------------------------------------------------------------------------------------------------------------------------------------------------------------------------------------------------------|----------------------------------------------------------------------------------------------------------------------------------------------------------------------------------|

\*This item was re-numbered to 18

|    |                               |      |                                                                                                               |
|----|-------------------------------|------|---------------------------------------------------------------------------------------------------------------|
| 21 | CAD risk stratification in FH | *Nil | <p>New Question:</p> <p>How would you risk stratify patients diagnosed with FH clinically?</p> <p>Answer:</p> |
|----|-------------------------------|------|---------------------------------------------------------------------------------------------------------------|

- 
- Perform coronary risk scoring e.g. Framingham Risk Score
  - Classify patients as high risk irrespective of other risk factors
  - Calculate calcium score using cardiac CT scan
  - Determine serum hsCRP concentration
  - Don't know

---

**Total items: 9**

---

**Total items: 9**

---
